# Supplementary material for: Association of Genome-Wide Polygenic Scores for Multiple Psychiatric and Common Traits in Preadolescent Youths at Risk of Suicide
Source: PubMed Central journal article supplement (PMC8861848; doi:10.1001/jamanetworkopen.2021.48585), 2022-02-21
Supplement: jamanetwopen-e2148585-s001.pdf [file jamanetwopen-e2148585-s001.pdf]

## Supplementary Online Content

Joo YY, Moon SY, Wang HH, et al. Association of genome-wide polygenic scores for multiple psychiatric and common traits in preadolescent youths at risk of suicide. *JAMA Network Open*. 2022;5(2):e2148585. doi:10.1001/jamanetworkopen.2021.48585

**eMethods.** Genotype Data and Outcomes and Measures

**eResults.** Multiethnic Participants

**eTable 1.** Genome-Wide Association Study List for Generating the Polygenic Scores of 24 Common and Psychiatric Traits

**eTable 2.** Suicidal Ideation and Attempt Items in Detail

**eTable 3.** Sociodemographic and Clinical Outcomes of Participants From the Adolescent Brain and Cognitive Development (ABCD) Study

**eTable 4.** Top Results of Main Analysis of Association Between Multitrait Genome-Wide Polygenic Scores and Suicidal Phenotypes

**eTable 5.** Top Results of Sensitivity Analysis Using Only Healthy Control Group Without Any Records From the Kiddie Schedule for Affective Disorders and Schizophrenia

**eTable 6.** Prediction Performance of 3 Machine Learning Models Based on Genome-Wide Polygenic Scores and Cognitive, Psychological, Behavioral, Environmental, and Familial Variables for Suicidal Thoughts and Behavior Among Youths

**eTable 7.** Feature Importance of Elastic Net Model for Prediction of Suicidal Thoughts and Behaviors Among Youths

**eTable 8.** Early Life Stress Scale in Detail

**eFigure 1.** Biplot From Principal Component Analysis of the Combined Genotype Data of the 1000-Genome Reference Panel (Phase 3, Release 5) and Study Participants From the Adolescent Brain and Cognitive Development (ABCD)

**eFigure 2.** Analysis of the Association Between Multitrait Genome-Wide Polygenic Scores and Suicidal Thoughts and Behaviors Among 6592 Multiethnic Children

**eReferences**

This supplementary material has been provided by the authors to give readers additional information about their work.

## **eMethods. Genotype Data and Outcomes and Measures**

### **Genotype data**

Our study samples have complex genetic structures owing to the presence of numerous familial relatives, diverse genetic ancestries and admixed samples innate to the U.S. population. Identifying sample relatedness in the presence of genetic-ancestry variation and vice versa is challenging especially in admixed populations, thus robust approaches for identifying each of these structures were implemented in this study. We used PC-Air to estimate ancestrally-informative principal components(PCs) of the genotypes that is robust to the related pedigree structure, and PC-Relate to provide accurate estimate of recent genetic relatedness measures from the population with ancestry admixture.

In this study, we estimated both kinship coefficients (KCs) and principal components (PCs) to control familial relatedness, population structures and ancestry admixture by using both PC-Air<sup>1</sup> and PC-Relate<sup>2</sup> Firstly, we selected autosomal SNPs by LD pruning such that all pairs had  $r^2 < 0.1$  in a sliding 10Mb window in a set of individuals estimated to be more distant than 3<sup>rd</sup> degree relatives. This selection procedure resulted in approximately 718,125 SNPs with missing call rate  $< 5\%$  and  $MAF > 0.5\%$ . Then, we obtained initial KC estimates with KING-robust, which is robust to discrete population structure but is known to be relatively biased in admixed individuals. Then we performed the PC analysis with PC-Air, which is robust to the genetic relatedness identified in the sample. Based on the computed PCs, we found updated KC estimates with PC-Relate, which accounts for population structure and provides accurate estimates in the presence of admixture. At this point, we plotted the genotype PCs of the unrelated samples and determined that the 5<sup>th</sup> and 6<sup>th</sup> PC mainly separated 228 outliers with high proportions of East Asian or African ancestry from the remaining subjects. (**eFigure 1**). Since these individuals seems to be genetically distinct from the rest of the individuals, we removed the outliers fell outside the 6 standard deviation limits from the center in PC5-6 space, and repeated the PC-Air and PC-Relate steps described above. To prevent the potential misidentification, we performed the steps until there were no extreme PC outliers in the final sample set and all pairs of the selected individuals inferred to be 4<sup>th</sup> degree relatives or farther ( $KC > 0.022$ ).

### **Outcomes and Measures**

The following variables were additionally considered for inputs to the classification models. For psychopathology, ABCD Parent-Child Behavior Checklist (CBCL); for intelligence, NIH toolbox;58 for a family environment, Youth Family Environment Scale; and for ELS, abuse (physical and sexual), household challenges (family substance abuse, family mental illness, family criminals, parental separation, or divorce, and violently treated mothers) and neglect (emotional and physical neglect). The items assessing ELS were extracted from various measurement tools reported by children themselves or parents (**eTable 8**). An ELS composite score was calculated by averaging z-standardized scores of each subtype. Higher A higher composite score indicates a more severe ELS.

## **eResults.** Multiethnic Participants

In the entire, multiethnic participants, the results largely remained unchanged for predicting suicidal ideation. The ROC-AUC of the integrative prediction model increased to 0.746 (95% CI, 0.708-0.784; Accuracy, 0.670), whereas the ROC-AUC of the baseline model was 0.584 (95% CI, 0.550-0.618; Accuracy, 0.529). However, we did not detect significant improvement in predicting overall suicidality and suicide attempts with multitrait GPSs. The estimated feature importance showed that the top 10 important features for prediction were mostly CBCL measures, such as assessing depressive symptoms or internalizing symptoms, except for ADHD GPS for overall suicidality prediction (**eTable 7B**). Without self-reported questionnaire data, the baseline model showed a ROC-AUC of 0.550 (95% CI, 0.517-0.582; Accuracy, 0.545) for overall suicidality and 0.652 (95% CI, 0.559-0.746; Accuracy, 0.536) for suicide attempt. In the presence of GPS and self-reported phenotypes, the ROC-AUC increased to 0.705 (95% CI, 0.665-0.746; Accuracy, 0.682) for overall suicidality and 0.725 (95% CI, 0.571-0.878; Accuracy, 0.765) for suicide attempt. All prediction results are based on the elastic net model, and the results for logistic regression and random forest classifier are presented in **eTable 6B**.

**eTable 1.** Genome-Wide Association Study List for Generating the Polygenic Scores of 24 Common and Psychiatric Traits

| Trait                                                  | Original GWAS Sample Size | Download link for Summary Statistics                                                                                                                                                                                                                                                          | Study                                                                                                                                                                                                                                                                                                                                       |
|--------------------------------------------------------|---------------------------|-----------------------------------------------------------------------------------------------------------------------------------------------------------------------------------------------------------------------------------------------------------------------------------------------|---------------------------------------------------------------------------------------------------------------------------------------------------------------------------------------------------------------------------------------------------------------------------------------------------------------------------------------------|
| <b>Attention-deficit/hyperactivity disorder (ADHD)</b> | 55,374                    | <a href="https://www.med.unc.edu/pgc/download-results/adhd/?choice=Attention+Deficit+Hyperactivity+Disorder+%28ADHD%29">https://www.med.unc.edu/pgc/download-results/adhd/?choice=Attention+Deficit+Hyperactivity+Disorder+%28ADHD%29</a>                                                     | Demontis, D., Walters, R.K., Martin, J. et al. (2019). Discovery of the first genome-wide significant risk loci for attention deficit/hyperactivity disorder. <i>Nature Genetics</i> . 51, 63-75. <a href="https://doi.org/10.1038/s41588-018-0269-7">https://doi.org/10.1038/s41588-018-0269-7</a>                                         |
| <b>Autism spectrum disorder (ASD)</b>                  | 46,350                    | <a href="https://www.med.unc.edu/pgc/results-and-downloads/">https://www.med.unc.edu/pgc/results-and-downloads/</a>                                                                                                                                                                           | Grove, J., Ripke, S., Als, T.D. et al. (2019). Identification of common genetic risk variants for autism spectrum disorder. <i>Nature Genetics</i> . 51, 431-444. <a href="https://doi.org/10.1038/s41588-019-0344-8">https://doi.org/10.1038/s41588-019-0344-8</a>                                                                         |
| <b>Bipolar disorder (BIP)</b>                          | 51,710                    | <a href="https://www.med.unc.edu/pgc/results-and-downloads">https://www.med.unc.edu/pgc/results-and-downloads</a>                                                                                                                                                                             | Stahl, E.A., Breen, G., Forstner, A.J. et al. (2019). Genome-wide association study identifies 30 loci associated with bipolar disorder. <i>Nature Genetics</i> . 51, 793-803. <a href="https://doi.org/10.1038/s41588-019-0397-8">https://doi.org/10.1038/s41588-019-0397-8</a>                                                            |
| <b>Schizophrenia (SCZ)</b>                             | 65,967                    | <a href="https://www.med.unc.edu/pgc/download-results/scz-bip/?choice=Schizophrenia+%28SCZ%29+Schizophrenia+%28SCZ%29+Bipolar+Disorder+%28BIP%29">https://www.med.unc.edu/pgc/download-results/scz-bip/?choice=Schizophrenia+%28SCZ%29+Schizophrenia+%28SCZ%29+Bipolar+Disorder+%28BIP%29</a> | Douglas M. Ruderfer (2018). Genomic Dissection of Bipolar Disorder and Schizophrenia, Including 28 Subphenotypes. <i>Cell</i> . 173(7), 1705-1715. <a href="https://doi.org/10.1016/j.cell.2018.05.046">https://doi.org/10.1016/j.cell.2018.05.046</a>                                                                                      |
| <b>Major depressive disorder (MDD)</b>                 | 807,553                   | <a href="https://doi.org/10.7488/ds/2458">https://doi.org/10.7488/ds/2458</a>                                                                                                                                                                                                                 | Howard, D.M., Adams, M.J., Clarke, T. et al. (2019). Genome-wide meta-analysis of depression identifies 102 independent variants and highlights the importance of the prefrontal brain regions. <i>Nature Neuroscience</i> . 22, 343-352. <a href="https://doi.org/10.1038/s41593-018-0326-7">https://doi.org/10.1038/s41593-018-0326-7</a> |
| <b>Posttraumatic stress disorder (PTSD)</b>            | 206,655                   | <a href="https://www.med.unc.edu/pgc/results-and-downloads">https://www.med.unc.edu/pgc/results-and-downloads</a>                                                                                                                                                                             | Nievergelt, C.M., Maihofer, A.X., Klengel, T. et al. (2019). International meta-analysis of PTSD genome-wide association studies identifies sex - and ancestry - specific genetic risk loci. <i>Nature Communications</i> . 10, 4558.                                                                                                       |

|                                      |         |                                                                                                               |                                                                                                                                                                                                                                                                                                                                                       |
|--------------------------------------|---------|---------------------------------------------------------------------------------------------------------------|-------------------------------------------------------------------------------------------------------------------------------------------------------------------------------------------------------------------------------------------------------------------------------------------------------------------------------------------------------|
|                                      |         |                                                                                                               | <a href="https://doi.org/10.1038/s41467-019-12576-w">https://doi.org/10.1038/s41467-019-12576-w</a>                                                                                                                                                                                                                                                   |
| <b>Substance use disorders (SUD)</b> | 184,765 | <a href="http://ldsc.broadinstitute.org/gwashare/">http://ldsc.broadinstitute.org/gwashare/</a>               | Pasman, J.A., Verweij, K.J.H., Gerring, Z. et al. (2018). GWAS of lifetime cannabis use reveals new risk loci, genetic overlap with psychiatric traits, and a causal effect of schizophrenia liability. <i>Nature Neuroscience</i> . 21, 1161-1170. <a href="https://doi.org/10.1038/s41593-018-0206-1">https://doi.org/10.1038/s41593-018-0206-1</a> |
| <b>IQ</b>                            | 269,867 | <a href="https://ctg.cncr.nl/software/summary_statistics">https://ctg.cncr.nl/software/summary_statistics</a> | Savage JE, et al. Genome-wide association meta-analysis (N=269,867) identifies new genetic and functional links to intelligence. <i>Nature Genetics</i> , 2018 Jul;50(7):912-919                                                                                                                                                                      |
| <b>Depression</b>                    | 381,455 | <a href="https://ctg.cncr.nl/software/summary_statistics">https://ctg.cncr.nl/software/summary_statistics</a> | Meta-analysis of genome-wide association studies for neuroticism in 449,484 individuals identifies novel genetic loci and pathways (Nagel et al., <i>Nature Genetics</i> , 2018)                                                                                                                                                                      |
| <b>Worry subcluster</b>              | 348,219 | <a href="https://ctg.cncr.nl/software/summary_statistics">https://ctg.cncr.nl/software/summary_statistics</a> | Meta-analysis of genome-wide association studies for neuroticism in 449,484 individuals identifies novel genetic loci and pathways (Nagel et al., <i>Nature Genetics</i> , 2018)                                                                                                                                                                      |
| <b>Alzheimer disease</b>             | 455,258 | <a href="https://ctg.cncr.nl/software/summary_statistics">https://ctg.cncr.nl/software/summary_statistics</a> | Genome-wide meta-analysis identifies new loci and functional pathways influencing Alzheimer's disease risk <i>Nature Genetics</i> , 2019 Mar;51(3):404-413. doi: 10.1038/s41588-018-0311-9                                                                                                                                                            |
| <b>insomnia</b>                      | 386,533 | <a href="https://ctg.cncr.nl/software/summary_statistics">https://ctg.cncr.nl/software/summary_statistics</a> | Genome-wide analysis of insomnia in 1,331,010 individuals identifies new risk loci and functional pathways. <i>Nature Genetics</i> 2019 Mar;51(3):394-403. doi: 10.1038/s41588-018-0333-3.                                                                                                                                                            |
| <b>Snoring</b>                       | 359,916 | <a href="https://ctg.cncr.nl/software/summary_statistics">https://ctg.cncr.nl/software/summary_statistics</a> | Genome-wide analysis of insomnia in 1,331,010 individuals identifies new risk loci and functional pathways. <i>Nature Genetics</i> 2019 Mar;51(3):394-403. doi: 10.1038/s41588-018-0333-3.                                                                                                                                                            |

|                                                                                 |         |                                                                                         |                                                                                                                                                                                                                                                                                                        |
|---------------------------------------------------------------------------------|---------|-----------------------------------------------------------------------------------------|--------------------------------------------------------------------------------------------------------------------------------------------------------------------------------------------------------------------------------------------------------------------------------------------------------|
| <b>General risk tolerance</b>                                                   | 466,571 | <a href="https://www.thessgac.org/data">https://www.thessgac.org/data</a>               | Karlsson LinnÅr et al. (2019). Genome-wide association analyses of risk tolerance and risky behaviors in over one million individuals identify hundreds of loci and shared genetic influences. <i>Nature Genetics</i> 51; 245-257.                                                                     |
| <b>Drinks per week</b>                                                          | 414,343 | <a href="https://www.thessgac.org/data">https://www.thessgac.org/data</a>               | Karlsson LinnÅr et al. (2019). Genome-wide association analyses of risk tolerance and risky behaviors in over one million individuals identify hundreds of loci and shared genetic influences. <i>Nature Genetics</i> 51; 245-257.                                                                     |
| <b>Smoking status (ever smoker)</b>                                             | 518,633 | <a href="https://www.thessgac.org/data">https://www.thessgac.org/data</a>               | Karlsson LinnÅr et al. (2019). Genome-wide association analyses of risk tolerance and risky behaviors in over one million individuals identify hundreds of loci and shared genetic influences. <i>Nature Genetics</i> 51; 245-257.                                                                     |
| <b>The first PC of the four risky behaviors</b>                                 | 315,894 | <a href="https://www.thessgac.org/data">https://www.thessgac.org/data</a>               | Karlsson LinnÅr et al. (2019). Genome-wide association analyses of risk tolerance and risky behaviors in over one million individuals identify hundreds of loci and shared genetic influences. <i>Nature Genetics</i> 51; 245-257.                                                                     |
| <b>Happiness and subjective well-being - general happiness</b>                  | 126,132 | <a href="http://www.nealelab.is/uk-biobank/">http://www.nealelab.is/uk-biobank/</a>     | UK Biobank GWAS. Neale Lab. <a href="http://www.nealelab.is/uk-biobank/">http://www.nealelab.is/uk-biobank/</a> Accessed Apr 29, 2020.                                                                                                                                                                 |
| <b>Happiness and subjective well-being - general happiness with own health</b>  | 126,477 | <a href="http://www.nealelab.is/uk-biobank/">http://www.nealelab.is/uk-biobank/</a>     | UK Biobank GWAS. Neale Lab. <a href="http://www.nealelab.is/uk-biobank/">http://www.nealelab.is/uk-biobank/</a> Accessed Apr 29, 2020.                                                                                                                                                                 |
| <b>Happiness and subjective well-being - belief that own life is meaningful</b> | 123,818 | <a href="http://www.nealelab.is/uk-biobank/">http://www.nealelab.is/uk-biobank/</a>     | UK Biobank GWAS. Neale Lab. <a href="http://www.nealelab.is/uk-biobank/">http://www.nealelab.is/uk-biobank/</a> Accessed Apr 29, 2020.                                                                                                                                                                 |
| <b>Subjective well-being</b>                                                    | 128,677 | <a href="http://www.thessgac.org/#!data/kuzq8">http://www.thessgac.org/#!data/kuzq8</a> | Okbay, A., Baselmans, B., De Neve, JE. et al. Genetic variants associated with subjective well-being, depressive symptoms, and neuroticism identified through genome-wide analyses. <i>Nat Genet</i> 48, 624–633 (2016). <a href="https://doi.org/10.1038/ng.3552">https://doi.org/10.1038/ng.3552</a> |
| <b>Educational attainment</b>                                                   | 766,345 | <a href="http://www.thessgac.org/data">http://www.thessgac.org/data</a>                 | Lee et al. (2018). Gene discovery and polygenic prediction from a 1.1-million-person GWAS of educational attainment. <i>Nature Genetics</i> , 50(8), 1112-1121. doi: 10.1038/s41588-018-0147-3                                                                                                         |

|                                              |                |                                                                                  |                                                                                                                                                                                                                                           |
|----------------------------------------------|----------------|----------------------------------------------------------------------------------|-------------------------------------------------------------------------------------------------------------------------------------------------------------------------------------------------------------------------------------------|
| <p><b>Cognitive performance</b></p>          | <p>257,828</p> | <p><a href="http://www.thessgac.org/data">http://www.thessgac.org/data</a></p>   | <p>Lee et al. (2018). Gene discovery and polygenic prediction from a 1.1-million-person GWAS of educational attainment. <i>Nature Genetics</i>, 50(8), 1112-1121. doi: 10.1038/s41588-018-0147-3</p>                                      |
| <p><b>Automobile speeding propensity</b></p> | <p>404,291</p> | <p><a href="https://www.thessgac.org/data">https://www.thessgac.org/data</a></p> | <p>Karlsson LinnÅr et al. (2019). Genome-wide association analyses of risk tolerance and risky behaviors in over one million individuals identify hundreds of loci and shared genetic influences. <i>Nature Genetics</i> 51; 245-257.</p> |

**eTable 2.** Suicidal Ideation and Attempt Items in Detail

| Suicidality features      | Sub-scale                                       | K-SADS items   |                | Item description                                                       |
|---------------------------|-------------------------------------------------|----------------|----------------|------------------------------------------------------------------------|
|                           |                                                 | Current        | Past           |                                                                        |
| Passive suicidal ideation | Passive suicidal ideation                       | ksads_23_946_t | ksads_23_957_t | A current or previous wish to be dead or thought to be better off dead |
|                           |                                                 | ksads_23_946_p | ksads_23_957_p |                                                                        |
| Active suicidal ideation  | Active non-specific suicidal ideation           | ksads_23_947_t | ksads_23_958_t | A current or previous desire to kill oneself or die by suicide         |
|                           |                                                 | ksads_23_947_p | ksads_23_958_p |                                                                        |
|                           | Active suicidal ideation with a specific method | ksads_23_948_t | ksads_23_959_t | A current or previous thought about how to die by suicide              |
|                           |                                                 | ksads_23_948_p | ksads_23_959_p |                                                                        |
|                           | Active suicidal ideation with intent            | ksads_23_949_t | ksads_23_960_t | A current or previous intent to act on suicidal thought                |
|                           |                                                 | ksads_23_949_p | ksads_23_960_p |                                                                        |
|                           | Active suicidal ideation with plan              | ksads_23_950_t | ksads_23_961_t | A current or previous thought about specific plan on suicide           |
|                           |                                                 | ksads_23_950_p | ksads_23_961_p |                                                                        |
| Suicidal attempt          | Suicidal attempt                                | ksads_23_954_t | ksads_23_965_t | Lifetime experience of suicidal attempt                                |
|                           |                                                 | ksads_23_954_p | ksads_23_965_p |                                                                        |



**eTable 3.** Sociodemographic and Clinical Outcomes of Participants From the Adolescent Brain and Cognitive Development (ABCD) Study

(A) The entire multiethnic participants used for the prediction task, imputed for continuous variables (n=7,140)

|                                                                                                                                                                                                                                                                                                                                                                                                                  | Youth with suicidality (n=1,012) |                      | Control Youth (N=6,128) |                      | Statistics                        |
|------------------------------------------------------------------------------------------------------------------------------------------------------------------------------------------------------------------------------------------------------------------------------------------------------------------------------------------------------------------------------------------------------------------|----------------------------------|----------------------|-------------------------|----------------------|-----------------------------------|
|                                                                                                                                                                                                                                                                                                                                                                                                                  | Count or Mean                    | Percentage (%) or SD | Count or Mean           | Percentage (%) or SD |                                   |
| <b>Female</b>                                                                                                                                                                                                                                                                                                                                                                                                    | 618                              | 61.1%                | 2,970                   | 48.5%                | $\chi^2 = 31.3$<br>( $P < .001$ ) |
| <b>Mean age (in months)</b>                                                                                                                                                                                                                                                                                                                                                                                      | 118.7                            | 7.35                 | 119                     | 7.31                 | $t = -1.08$<br>( $P = .28$ )      |
| <b>Mean income (bracket in 1~10 scales)</b>                                                                                                                                                                                                                                                                                                                                                                      | 7.1                              | 2.27                 | 7.42                    | 2.22                 | $t = -4.19$<br>( $P < .001$ )     |
| <b>Marital status of the family (currently married)</b>                                                                                                                                                                                                                                                                                                                                                          | 631                              | 62.4%                | 4,360                   | 71.1%                | $\chi^2 = 41.2$<br>( $P < .001$ ) |
| <b>Mean mother's educational attainment</b>                                                                                                                                                                                                                                                                                                                                                                      | 16.7                             | 2.57                 | 16.7                    | 2.72                 | $t = -0.65$<br>( $P = .52$ )      |
| <b>Self-reported race (white)</b>                                                                                                                                                                                                                                                                                                                                                                                | 547                              | 54.1%                | 3,438                   | 56.1%                | $\chi^2 = 11.5$<br>( $P = .02$ )  |
| <b>Site for sample collection (site ID of largest sample = 16)</b>                                                                                                                                                                                                                                                                                                                                               | 94                               | 9.29%                | 560                     | 9.14%                | $\chi^2 = 33.5$<br>( $P = .04$ )  |
| <p><i>*The scale of mean income is as follows. 1= Less than \$5,000; 2=\$5,000 to \$11,999; 3=\$12,000 to \$15,999; 4=\$16,000 to \$24,999; 5=\$25,000 to \$34,999; 6=\$35,000 to \$49,999; 7=\$50,000 to \$74,999; 8= \$75,000 to \$99,999; 9=\$100,000 to \$199,999; 10=\$200,000 or greater. through \$74,999; 8= \$75,000 through \$99,999; 9=\$100,000 through \$199,999; 10=\$200,000 and greater.</i></p> |                                  |                      |                         |                      |                                   |

(B) The European-ancestry participants used for ancestry-stratified analysis (n=5,888)

|                                                                                                                                                                                                                                                                                                                                                                                                                  | Youth with suicidality<br>(n=826) |                         | Control<br>Youth (N=5,062) |                         | Statistics                        |
|------------------------------------------------------------------------------------------------------------------------------------------------------------------------------------------------------------------------------------------------------------------------------------------------------------------------------------------------------------------------------------------------------------------|-----------------------------------|-------------------------|----------------------------|-------------------------|-----------------------------------|
|                                                                                                                                                                                                                                                                                                                                                                                                                  | Count<br>or Mean                  | Percentage<br>(%) or SD | Count<br>or Mean           | Percentage<br>(%) or SD |                                   |
| <b>Female</b>                                                                                                                                                                                                                                                                                                                                                                                                    | 523                               | 63.3%                   | 2,684                      | 53.00%                  | $\chi^2 = 27.1$<br>( $P < .001$ ) |
| <b>Mean age (in<br/>months)</b>                                                                                                                                                                                                                                                                                                                                                                                  | 118.8                             | 7.42                    | 119.0                      | 7.34                    | $t = -0.76$<br>( $P = .45$ )      |
| <b>Mean income<br/>(bracket in 1~10<br/>scales)</b>                                                                                                                                                                                                                                                                                                                                                              | 7.44                              | 2.11                    | 7.84                       | 1.96                    | $t = -4.83$<br>( $P < .001$ )     |
| <b>Marital status of the<br/>family (currently<br/>married)</b>                                                                                                                                                                                                                                                                                                                                                  | 565                               | 68.4%                   | 3,926                      | 77.6%                   | $\chi^2 = 43.4$<br>( $P < .001$ ) |
| <b>Mean mother's<br/>educational<br/>Attainment</b>                                                                                                                                                                                                                                                                                                                                                              | 17                                | 2.3                     | 17.2                       | 2.37                    | $t = -1.98$<br>( $P = .048$ )     |
| <b>Self-reported race<br/>(white)</b>                                                                                                                                                                                                                                                                                                                                                                            | 569                               | 68.9%                   | 3,515                      | 69.4%                   | $\chi^2 = 7.45$<br>( $P = .11$ )  |
| <b>Site for sample<br/>collection (site ID of<br/>largest sample =<br/>16)</b>                                                                                                                                                                                                                                                                                                                                   | 117                               | 14.2%                   | 638                        | 12.6%                   | $\chi^2 = 34.9$<br>( $P = .03$ )  |
| <p><i>*The scale of mean income is as follows. 1= Less than \$5,000; 2=\$5,000 to \$11,999; 3=\$12,000 to \$15,999; 4=\$16,000 to \$24,999; 5=\$25,000 to \$34,999; 6=\$35,000 to \$49,999; 7=\$50,000 to \$74,999; 8= \$75,000 to \$99,999; 9=\$100,000 to \$199,999; 10=\$200,000 or greater. through \$74,999; 8= \$75,000 through \$99,999; 9=\$100,000 through \$199,999; 10=\$200,000 and greater.</i></p> |                                   |                         |                            |                         |                                   |

**eTable 4.** Top Results of Main Analysis of Association Between Multitrait Genome-Wide Polygenic Scores and Suicidal Phenotypes ( $P < .05$ )

(A) Analysis of entire multiethnic participants (n=6,587)

| Outcome                 | GPS predictor               | Beta  | SE   | OR   | p-value   | Total N | N of cases | FDR significance |
|-------------------------|-----------------------------|-------|------|------|-----------|---------|------------|------------------|
| Outcome                 | GPS predictor               | Beta  | SE   | OR   | p-value   | Total N | N of cases | FDR significance |
| Suicidalideation        | ADHD                        | 0.12  | 0.04 | 1.12 | 1.34.E-03 | 6587    | 930        | TRUE             |
| SuicidalideationActive  | ADHD                        | 0.16  | 0.05 | 1.17 | 1.43.E-03 | 6146    | 489        | TRUE             |
| SuicideAttempt          | SCZ                         | 0.41  | 0.13 | 1.50 | 1.60.E-03 | 5721    | 64         | TRUE             |
| Suicide_all             | ADHD                        | 0.11  | 0.04 | 1.12 | 1.69.E-03 | 6592    | 935        | TRUE             |
| Suicidalideation        | GENERALHAPPINESS_MEANINGFUL | -0.11 | 0.04 | 0.89 | 1.78.E-03 | 6587    | 930        | TRUE             |
| Suicide_all             | GENERALHAPPINESS_MEANINGFUL | -0.11 | 0.04 | 0.90 | 2.88.E-03 | 6592    | 935        | FALSE            |
| SuicidalideationActive  | ASD                         | 0.14  | 0.05 | 1.15 | 3.21.E-03 | 6146    | 489        | FALSE            |
| SuicidalideationPassive | ADHD                        | 0.12  | 0.04 | 1.12 | 3.37.E-03 | 6431    | 774        | FALSE            |
| SuicidalideationActive  | INSOMNIA                    | 0.14  | 0.05 | 1.15 | 4.36.E-03 | 6146    | 489        | FALSE            |
| Suicide_all             | PTSD                        | 0.10  | 0.04 | 1.10 | 5.19.E-03 | 6592    | 935        | FALSE            |
| Suicidalideation        | PTSD                        | 0.10  | 0.04 | 1.10 | 5.83.E-03 | 6587    | 930        | FALSE            |
| SuicidalideationPassive | PTSD                        | 0.11  | 0.04 | 1.11 | 5.89.E-03 | 6431    | 774        | FALSE            |
| SuicidalideationPassive | GENERALHAPPINESS_MEANINGFUL | -0.11 | 0.04 | 0.90 | 5.92.E-03 | 6431    | 774        | FALSE            |
| SuicideAttempt          | GENERALHAPPINESS            | -0.37 | 0.13 | 0.69 | 6.05.E-03 | 5721    | 64         | FALSE            |
| Suicidalideation        | MDD                         | 0.10  | 0.04 | 1.10 | 6.64.E-03 | 6587    | 930        | FALSE            |
| Suicide_all             | MDD                         | 0.10  | 0.04 | 1.10 | 7.31.E-03 | 6592    | 935        | FALSE            |
| SuicidalideationPassive | MDD                         | 0.10  | 0.04 | 1.10 | 1.04.E-02 | 6431    | 774        | FALSE            |
| Suicidalideation        | INSOMNIA                    | 0.09  | 0.04 | 1.09 | 1.22.E-02 | 6587    | 930        | FALSE            |
| Suicide_all             | INSOMNIA                    | 0.09  | 0.04 | 1.09 | 1.23.E-02 | 6592    | 935        | FALSE            |
| SuicideAttempt          | IQ                          | 0.32  | 0.13 | 1.37 | 1.48.E-02 | 5721    | 64         | FALSE            |
| SuicidalideationPassive | SMOKER                      | 0.09  | 0.04 | 1.09 | 2.49.E-02 | 6431    | 774        | FALSE            |
| Suicidalideation        | ASD                         | 0.08  | 0.04 | 1.08 | 2.75.E-02 | 6587    | 930        | FALSE            |
| Suicidalideation        | SMOKER                      | 0.08  | 0.04 | 1.08 | 3.55.E-02 | 6587    | 930        | FALSE            |
| Suicide_all             | SMOKER                      | 0.07  | 0.04 | 1.08 | 3.88.E-02 | 6592    | 935        | FALSE            |
| Suicide_all             | ASD                         | 0.07  | 0.04 | 1.08 | 3.88.E-02 | 6592    | 935        | FALSE            |

(B) Analysis of European-ancestry participants (n=5,374)

| Outcome                 | GPS predictor               | Beta  | SE   | OR   | p-value   | Total N | N of cases | FDR significance |
|-------------------------|-----------------------------|-------|------|------|-----------|---------|------------|------------------|
| Suicidalideation        | ADHD                        | 0.13  | 0.04 | 1.14 | 8.70.E-04 | 5372    | 735        | TRUE             |
| Suicide_all             | ADHD                        | 0.13  | 0.04 | 1.14 | 1.02.E-03 | 5374    | 737        | TRUE             |
| SuicidalideationPassive | ADHD                        | 0.14  | 0.04 | 1.15 | 1.27.E-03 | 5257    | 620        | TRUE             |
| SuicideAttempt          | SCZ                         | 0.48  | 0.15 | 1.61 | 1.27.E-03 | 4682    | 45         | TRUE             |
| SuicidalideationActive  | ADHD                        | 0.17  | 0.05 | 1.19 | 1.42.E-03 | 5011    | 374        | TRUE             |
| SuicidalideationActive  | ASD                         | 0.17  | 0.05 | 1.18 | 1.70.E-03 | 5011    | 374        | TRUE             |
| Suicide_all             | MDD                         | 0.12  | 0.04 | 1.12 | 2.67.E-03 | 5374    | 737        | TRUE             |
| Suicidalideation        | MDD                         | 0.12  | 0.04 | 1.12 | 2.71.E-03 | 5372    | 735        | TRUE             |
| Suicidalideation        | GENERALHAPPINESS_MEANINGFUL | -0.12 | 0.04 | 0.89 | 2.80.E-03 | 5372    | 735        | TRUE             |
| Suicide_all             | GENERALHAPPINESS_MEANINGFUL | -0.12 | 0.04 | 0.89 | 3.04.E-03 | 5374    | 737        | TRUE             |
| Suicide_all             | PTSD                        | 0.11  | 0.04 | 1.12 | 3.87.E-03 | 5374    | 737        | TRUE             |
| Suicidalideation        | PTSD                        | 0.11  | 0.04 | 1.12 | 4.04.E-03 | 5372    | 735        | TRUE             |
| SuicidalideationPassive | GENERALHAPPINESS_MEANINGFUL | -0.12 | 0.04 | 0.89 | 4.58.E-03 | 5257    | 620        | TRUE             |
| SuicidalideationPassive | MDD                         | 0.12  | 0.04 | 1.12 | 5.50.E-03 | 5257    | 620        | TRUE             |
| SuicidalideationPassive | PTSD                        | 0.12  | 0.04 | 1.12 | 5.52.E-03 | 5257    | 620        | TRUE             |
| Suicide_all             | SMOKER                      | 0.10  | 0.04 | 1.11 | 9.52.E-03 | 5374    | 737        | FALSE            |
| Suicidalideation        | SMOKER                      | 0.10  | 0.04 | 1.11 | 9.68.E-03 | 5372    | 735        | FALSE            |
| SuicidalideationPassive | RISK4PC                     | 0.10  | 0.04 | 1.11 | 1.37.E-02 | 5257    | 620        | FALSE            |
| SuicidalideationPassive | SMOKER                      | 0.10  | 0.04 | 1.11 | 1.94.E-02 | 5257    | 620        | FALSE            |
| SuicideAttempt          | IQ                          | 0.34  | 0.15 | 1.41 | 2.62.E-02 | 4682    | 45         | FALSE            |
| Suicidalideation        | INSOMNIA                    | 0.09  | 0.04 | 1.09 | 2.88.E-02 | 5372    | 735        | FALSE            |
| Suicide_all             | INSOMNIA                    | 0.09  | 0.04 | 1.09 | 3.17.E-02 | 5374    | 737        | FALSE            |
| Suicide_all             | RISK4PC                     | 0.08  | 0.04 | 1.09 | 3.31.E-02 | 5374    | 737        | FALSE            |
| Suicidalideation        | RISK4PC                     | 0.08  | 0.04 | 1.09 | 3.63.E-02 | 5372    | 735        | FALSE            |
| SuicidalideationActive  | NEUROTICISM                 | -0.11 | 0.05 | 0.89 | 3.70.E-02 | 5011    | 374        | FALSE            |

**eTable 5.** Top Results of Sensitivity Analysis Using Only Healthy Control Group Without Any KSADS Records ( $P < .05$ )

(A) Analysis of entire multiethnic participants (n=2,587)

| Outcome                 | GPS predictor               | OR                 | P-value   | N of cases | Bonferroni significance |
|-------------------------|-----------------------------|--------------------|-----------|------------|-------------------------|
| Suicide_all             | PTSD                        | 1.17 (1.07 - 1.27) | 3.35.E-04 | 935        | TRUE                    |
| Suicidalideation        | PTSD                        | 1.16 (1.07 - 1.27) | 3.90.E-04 | 930        | TRUE                    |
| SuicidalideationPassive | PTSD                        | 1.17 (1.07 - 1.28) | 5.44.E-04 | 774        | TRUE                    |
| SuicidalideationActive  | ASD                         | 1.20 (1.08 - 1.33) | 9.50.E-04 | 489        | TRUE                    |
| SuicideAttempt          | SCZ                         | 1.53 (1.17 - 1.99) | 2.05.E-03 | 64         | TRUE                    |
| SuicidalideationActive  | ADHD                        | 1.19 (1.06 - 1.33) | 2.47.E-03 | 489        | TRUE                    |
| Suicidalideation        | ADHD                        | 1.13 (1.04 - 1.23) | 4.52.E-03 | 930        | FALSE                   |
| Suicide_all             | ADHD                        | 1.13 (1.04 - 1.23) | 5.22.E-03 | 935        | FALSE                   |
| Suicidalideation        | GENERALHAPPINESS_MEANINGFUL | 0.89 (0.81 - 0.97) | 5.84.E-03 | 930        | FALSE                   |
| SuicidalideationPassive | SMOKER                      | 1.13 (1.04 - 1.24) | 5.85.E-03 | 774        | FALSE                   |
| SuicidalideationActive  | PTSD                        | 1.16 (1.04 - 1.29) | 8.31.E-03 | 489        | FALSE                   |
| Suicide_all             | GENERALHAPPINESS_MEANINGFUL | 0.89 (0.82 - 0.97) | 8.50.E-03 | 935        | FALSE                   |
| SuicidalideationPassive | ADHD                        | 1.13 (1.03 - 1.24) | 8.60.E-03 | 774        | FALSE                   |
| Suicidalideation        | SMOKER                      | 1.12 (1.03 - 1.22) | 8.64.E-03 | 930        | FALSE                   |
| Suicide_all             | SMOKER                      | 1.12 (1.03 - 1.22) | 9.16.E-03 | 935        | FALSE                   |
| Suicidalideation        | MDD                         | 1.12 (1.03 - 1.22) | 9.70.E-03 | 930        | FALSE                   |
| Suicide_all             | MDD                         | 1.12 (1.03 - 1.22) | 1.05.E-02 | 935        | FALSE                   |
| SuicidalideationActive  | INSOMNIA                    | 1.15 (1.03 - 1.28) | 1.07.E-02 | 489        | FALSE                   |
| SuicidalideationPassive | MDD                         | 1.13 (1.03 - 1.23) | 1.14.E-02 | 774        | FALSE                   |
| Suicidalideation        | ASD                         | 1.11 (1.02 - 1.21) | 1.32.E-02 | 930        | FALSE                   |
| SuicideAttempt          | GENERALHAPPINESS            | 0.70 (0.53 - 0.93) | 1.34.E-02 | 64         | FALSE                   |
| SuicidalideationPassive | GENERALHAPPINESS_MEANINGFUL | 0.89 (0.82 - 0.98) | 1.35.E-02 | 774        | FALSE                   |
| Suicide_all             | ASD                         | 1.11 (1.02 - 1.20) | 1.80.E-02 | 935        | FALSE                   |
| SuicidalideationActive  | SMOKER                      | 1.13 (1.01 - 1.26) | 2.93.E-02 | 489        | FALSE                   |
| SuicideAttempt          | IQ                          | 1.35 (1.02 - 1.79) | 3.41.E-02 | 64         | FALSE                   |
| Suicidalideation        | INSOMNIA                    | 1.09 (1.01 - 1.19) | 3.57.E-02 | 930        | FALSE                   |
| Suicide_all             | INSOMNIA                    | 1.09 (1.01 - 1.19) | 3.69.E-02 | 935        | FALSE                   |
| SuicidalideationPassive | ASD                         | 1.10 (1.00 - 1.20) | 4.06.E-02 | 774        | FALSE                   |
| SuicidalideationActive  | MDD                         | 1.12 (1.00 - 1.25) | 4.87.E-02 | 489        | FALSE                   |
| SuicidalideationPassive | EA                          | 0.91 (0.83 - 1.00) | 5.00.E-02 | 774        | FALSE                   |

(B) Analysis of European-ancestry participants (n=2,088)

| Outcome                 | GPS predictor               | OR                 | P-value   | N of cases | Bonferroni significance |
|-------------------------|-----------------------------|--------------------|-----------|------------|-------------------------|
| Suicide_all             | PTSD                        | 1.18 (1.08 - 1.29) | 3.03.E-04 | 737        | TRUE                    |
| Suicidalideation        | PTSD                        | 1.18 (1.08 - 1.29) | 3.17.E-04 | 735        | TRUE                    |
| SuicidalideationPassive | PTSD                        | 1.19 (1.08 - 1.30) | 5.10.E-04 | 620        | TRUE                    |
| Suicide_all             | SMOKER                      | 1.17 (1.06 - 1.29) | 1.11.E-03 | 737        | TRUE                    |
| Suicidalideation        | SMOKER                      | 1.17 (1.06 - 1.29) | 1.13.E-03 | 735        | TRUE                    |
| SuicidalideationActive  | ASD                         | 1.21 (1.08 - 1.37) | 1.41.E-03 | 374        | TRUE                    |
| SuicidalideationActive  | ADHD                        | 1.23 (1.08 - 1.39) | 1.49.E-03 | 374        | TRUE                    |
| SuicideAttempt          | SCZ                         | 1.62 (1.19 - 2.22) | 2.36.E-03 | 45         | TRUE                    |
| Suicidalideation        | ADHD                        | 1.16 (1.05 - 1.27) | 2.42.E-03 | 735        | TRUE                    |
| Suicide_all             | ADHD                        | 1.16 (1.05 - 1.27) | 2.54.E-03 | 737        | TRUE                    |
| SuicidalideationPassive | SMOKER                      | 1.16 (1.05 - 1.29) | 2.67.E-03 | 620        | TRUE                    |
| SuicidalideationPassive | ADHD                        | 1.16 (1.05 - 1.29) | 2.94.E-03 | 620        | TRUE                    |
| Suicide_all             | MDD                         | 1.14 (1.04 - 1.26) | 5.58.E-03 | 737        | TRUE                    |
| Suicidalideation        | MDD                         | 1.14 (1.04 - 1.26) | 5.70.E-03 | 735        | TRUE                    |
| SuicidalideationPassive | MDD                         | 1.14 (1.03 - 1.26) | 9.05.E-03 | 620        | FALSE                   |
| SuicidalideationActive  | SMOKER                      | 1.17 (1.04 - 1.33) | 9.81.E-03 | 374        | FALSE                   |
| Suicidalideation        | GENERALHAPPINESS_MEANINGFUL | 0.89 (0.81 - 0.97) | 9.86.E-03 | 735        | FALSE                   |
| Suicide_all             | GENERALHAPPINESS_MEANINGFUL | 0.89 (0.81 - 0.97) | 1.01.E-02 | 737        | FALSE                   |
| SuicidalideationActive  | PTSD                        | 1.16 (1.03 - 1.30) | 1.26.E-02 | 374        | FALSE                   |
| SuicidalideationPassive | GENERALHAPPINESS_MEANINGFUL | 0.88 (0.80 - 0.97) | 1.26.E-02 | 620        | FALSE                   |
| SuicidalideationPassive | EA                          | 0.88 (0.79 - 0.98) | 2.31.E-02 | 620        | FALSE                   |
| SuicidalideationPassive | RISK4PC                     | 1.12 (1.02 - 1.23) | 2.36.E-02 | 620        | FALSE                   |
| SuicidalideationActive  | INSOMNIA                    | 1.14 (1.01 - 1.29) | 3.22.E-02 | 374        | FALSE                   |
| Suicidalideation        | INSOMNIA                    | 1.10 (1.01 - 1.21) | 3.75.E-02 | 735        | FALSE                   |
| Suicide_all             | INSOMNIA                    | 1.10 (1.00 - 1.21) | 4.01.E-02 | 737        | FALSE                   |

**eTable 6.** Prediction Performance of 3 Machine Learning Models Based on Genome-Wide Polygenic Scores and Cognitive, Psychological, Behavioral, Environmental, and Familial Variables for Suicidal Thoughts and Behavior Among Youths

(A) Elastic net model

|                            |                                        | <u>European-ancestry individuals only</u> |               |                 |                    |                    |            |            |
|----------------------------|----------------------------------------|-------------------------------------------|---------------|-----------------|--------------------|--------------------|------------|------------|
| <b>Input Data</b>          |                                        | <b>ROC</b>                                | <b>95% CI</b> | <b>Accuracy</b> | <b>Sensitivity</b> | <b>Specificity</b> | <b>PPV</b> | <b>NPV</b> |
| <b>Overall Suicidality</b> | Demographic+GPS+ Environmental factors | <b>0.766</b>                              | 0.727 - 0.805 | 0.672           | 0.764              | 0.580              | 0.645      | 0.711      |
|                            | Demographic+ Environmental factors     | <b>0.730</b>                              | 0.686 - 0.775 | 0.682           | 0.723              | 0.641              | 0.668      | 0.698      |
|                            | Demographic+GPS                        | <b>0.575</b>                              | 0.527 - 0.623 | 0.558           | 0.574              | 0.542              | 0.556      | 0.560      |
|                            | Demographic only                       | <b>0.558</b>                              | 0.519 - 0.598 | 0.557           | 0.510              | 0.603              | 0.562      | 0.552      |
| <b>Suicidal Ideation</b>   | Demographic+GPS+ Environmental factors | <b>0.759</b>                              | 0.718 - 0.800 | 0.660           | 0.739              | 0.581              | 0.638      | 0.690      |
|                            | Demographic+ Environmental factors     | <b>0.731</b>                              | 0.688 - 0.774 | 0.689           | 0.758              | 0.620              | 0.666      | 0.719      |
|                            | Demographic+GPS                        | <b>0.603</b>                              | 0.556 - 0.650 | 0.558           | 0.583              | 0.533              | 0.555      | 0.561      |
|                            | Demographic only                       | <b>0.577</b>                              | 0.539 - 0.616 | 0.544           | 0.511              | 0.577              | 0.547      | 0.542      |
| <b>Suicide Attempt</b>     | Demographic+GPS+ Environmental factors | <b>0.929</b>                              | 0.874 - 0.985 | 0.838           | 0.858              | 0.818              | 0.825      | 0.852      |
|                            | Demographic+ Environmental factors     | <b>0.742</b>                              | 0.564 - 0.920 | 0.681           | 0.803              | 0.557              | 0.645      | 0.739      |
|                            | Demographic+GPS                        | <b>0.619</b>                              | 0.456 - 0.781 | 0.673           | 0.694              | 0.651              | 0.665      | 0.680      |
|                            | Demographic only                       | <b>0.636</b>                              | 0.531 - 0.740 | 0.603           | 0.661              | 0.544              | 0.592      | 0.616      |
|                            |                                        |                                           |               |                 |                    |                    |            |            |

|                            |                                        | <b>All individuals</b> |               |                 |                    |                    |            |            |
|----------------------------|----------------------------------------|------------------------|---------------|-----------------|--------------------|--------------------|------------|------------|
|                            | <b>Input Data</b>                      | <b>ROC</b>             | <b>95% CI</b> | <b>Accuracy</b> | <b>Sensitivity</b> | <b>Specificity</b> | <b>PPV</b> | <b>NPV</b> |
| <b>Overall Suicidality</b> | Demographic+GPS+ Environmental factors | <b>0.705</b>           | 0.665 - 0.746 | 0.682           | 0.755              | 0.609              | 0.659      | 0.713      |
|                            | Demographic+Environmental factors      | <b>0.705</b>           | 0.664 - 0.746 | 0.665           | 0.726              | 0.603              | 0.647      | 0.688      |
|                            | Demographic+GPS                        | <b>0.583</b>           | 0.542 - 0.624 | 0.547           | 0.580              | 0.514              | 0.544      | 0.551      |
|                            | Demographic only                       | <b>0.550</b>           | 0.517 - 0.582 | 0.545           | 0.513              | 0.577              | 0.548      | 0.542      |
| <b>Suicidal Ideation</b>   | Demographic+GPS+ Environmental factors | <b>0.746</b>           | 0.708 - 0.784 | 0.670           | 0.753              | 0.587              | 0.646      | 0.704      |
|                            | Demographic+Environmental factors      | <b>0.729</b>           | 0.691 - 0.767 | 0.663           | 0.725              | 0.600              | 0.645      | 0.686      |
|                            | Demographic+GPS                        | <b>0.587</b>           | 0.546 - 0.629 | 0.553           | 0.561              | 0.545              | 0.552      | 0.553      |
|                            | Demographic only                       | <b>0.584</b>           | 0.550 - 0.618 | 0.529           | 0.485              | 0.572              | 0.532      | 0.527      |
| <b>Suicide Attempt</b>     | Demographic+GPS+ Environmental factors | <b>0.725</b>           | 0.571 - 0.878 | 0.765           | 0.834              | 0.697              | 0.733      | 0.807      |
|                            | Demographic+Environmental factors      | <b>0.736</b>           | 0.575 - 0.898 | 0.754           | 0.819              | 0.687              | 0.723      | 0.792      |
|                            | Demographic+GPS                        | <b>0.661</b>           | 0.543 - 0.778 | 0.651           | 0.699              | 0.604              | 0.638      | 0.667      |
|                            | Demographic only                       | <b>0.652</b>           | 0.559 - 0.746 | 0.536           | 0.702              | 0.371              | 0.527      | 0.555      |



(B) Logistic regression (glm) and random forest model

|                            |                                         | European-ancestry individuals only |              |               |             |             |       |       |
|----------------------------|-----------------------------------------|------------------------------------|--------------|---------------|-------------|-------------|-------|-------|
|                            |                                         |                                    |              |               |             |             |       |       |
|                            | Input Data                              | Method                             | ROC          | 95% CI        | Sensitivity | Specificity | PPV   | NPV   |
| <b>Overall Suicidality</b> | Demographic+GPS + Environmental factors | GLM                                | <b>0.766</b> | 0.724 - 0.807 | 0.707       | 0.619       | 0.650 | 0.679 |
|                            |                                         | RandomForest                       | <b>0.755</b> | 0.716 - 0.794 | 0.741       | 0.614       | 0.657 | 0.703 |
|                            | Demographic+Environmental factors       | GLM                                | <b>0.731</b> | 0.687 - 0.776 | 0.723       | 0.646       | 0.671 | 0.700 |
|                            |                                         | RandomForest                       | <b>0.723</b> | 0.679 - 0.766 | 0.724       | 0.636       | 0.665 | 0.697 |
|                            | Demographic+GPS                         | GLM                                | <b>0.556</b> | 0.507 - 0.605 | 0.571       | 0.532       | 0.550 | 0.554 |
|                            |                                         | RandomForest                       | <b>0.576</b> | 0.528 - 0.624 | 0.576       | 0.527       | 0.549 | 0.554 |
|                            | Demographic only                        | GLM                                | <b>0.558</b> | 0.518 - 0.598 | 0.517       | 0.599       | 0.563 | 0.554 |
|                            |                                         | RandomForest                       | <b>0.562</b> | 0.522 - 0.602 | 0.517       | 0.589       | 0.557 | 0.549 |
| <b>Suicidal Ideation</b>   | Demographic+GPS + Environmental factors | GLM                                | <b>0.736</b> | 0.693 - 0.780 | 0.704       | 0.625       | 0.652 | 0.679 |
|                            |                                         | RandomForest                       | <b>0.758</b> | 0.718 - 0.799 | 0.695       | 0.630       | 0.653 | 0.674 |
|                            | Demographic+Environmental factors       | GLM                                | <b>0.728</b> | 0.684 - 0.772 | 0.721       | 0.646       | 0.671 | 0.698 |
|                            |                                         | RandomForest                       | <b>0.724</b> | 0.681 - 0.767 | 0.722       | 0.652       | 0.675 | 0.701 |
|                            | Demographic+GPS                         | GLM                                | <b>0.591</b> | 0.544 - 0.638 | 0.565       | 0.535       | 0.549 | 0.552 |
|                            |                                         | RandomForest                       | <b>0.591</b> | 0.544 - 0.637 | 0.545       | 0.534       | 0.539 | 0.540 |
|                            | Demographic only                        | GLM                                | <b>0.578</b> | 0.540 - 0.617 | 0.519       | 0.575       | 0.550 | 0.545 |
|                            |                                         | RandomForest                       | <b>0.578</b> | 0.538 - 0.617 | 0.501       | 0.592       | 0.551 | 0.543 |
| <b>Suicide Attempt</b>     | Demographic+GPS + Environmental factors | GLM                                | <b>0.718</b> | 0.575 - 0.862 | 0.494       | 0.485       | 0.490 | 0.489 |
|                            |                                         | RandomForest                       | <b>0.946</b> | 0.902 - 0.990 | 0.858       | 0.745       | 0.771 | 0.840 |
|                            | Demographic+Environmental factors       | GLM                                | <b>0.446</b> | 0.290 - 0.602 | 0.638       | 0.607       | 0.619 | 0.626 |
|                            |                                         | RandomForest                       | <b>0.774</b> | 0.632 - 0.917 | 0.782       | 0.599       | 0.661 | 0.733 |
|                            | Demographic+GPS                         | GLM                                | <b>0.606</b> | 0.438 - 0.773 | 0.612       | 0.630       | 0.623 | 0.619 |
|                            |                                         | RandomForest                       | <b>0.756</b> | 0.619 - 0.893 | 0.597       | 0.579       | 0.586 | 0.590 |

|                            |                                           |               |                        |               |                    |                    |            |            |
|----------------------------|-------------------------------------------|---------------|------------------------|---------------|--------------------|--------------------|------------|------------|
|                            | Demographic only                          | GLM           | <b>0.633</b>           | 0.527 - 0.738 | 0.678              | 0.566              | 0.610      | 0.637      |
|                            |                                           | RandomForest  | <b>0.575</b>           | 0.460 - 0.689 | 0.503              | 0.558              | 0.532      | 0.529      |
| <b>Overall Suicidality</b> | Demographic + GPS + Environmental factors | GLM           | <b>0.766</b>           | 0.724 - 0.807 | 0.707              | 0.619              | 0.650      | 0.679      |
|                            |                                           |               | <u>All individuals</u> |               |                    |                    |            |            |
|                            |                                           |               |                        |               |                    |                    |            |            |
|                            | <b>Input Data</b>                         | <b>Method</b> | <b>ROC</b>             | <b>95% CI</b> | <b>Sensitivity</b> | <b>Specificity</b> | <b>PPV</b> | <b>NPV</b> |
| <b>Overall Suicidality</b> | Demographic + GPS + Environmental factors | GLM           | <b>0.706</b>           | 0.664 - 0.747 | 0.724              | 0.630              | 0.662      | 0.695      |
|                            |                                           | RandomForest  | <b>0.705</b>           | 0.666 - 0.743 | 0.739              | 0.603              | 0.651      | 0.698      |
|                            | Demographic + Environmental factors       | GLM           | <b>0.709</b>           | 0.669 - 0.750 | 0.707              | 0.631              | 0.657      | 0.683      |
|                            |                                           | RandomForest  | <b>0.696</b>           | 0.657 - 0.735 | 0.702              | 0.626              | 0.652      | 0.677      |
|                            | Demographic + GPS                         | GLM           | <b>0.580</b>           | 0.539 - 0.622 | 0.573              | 0.506              | 0.537      | 0.542      |
|                            |                                           | RandomForest  | <b>0.576</b>           | 0.535 - 0.618 | 0.552              | 0.534              | 0.542      | 0.544      |
|                            | Demographic only                          | GLM           | <b>0.549</b>           | 0.517 - 0.582 | 0.521              | 0.571              | 0.548      | 0.544      |
|                            |                                           | RandomForest  | <b>0.552</b>           | 0.520 - 0.584 | 0.532              | 0.546              | 0.540      | 0.538      |
| <b>Suicidal Ideation</b>   | Demographic + GPS + Environmental factors | GLM           | <b>0.750</b>           | 0.713 - 0.788 | 0.705              | 0.620              | 0.650      | 0.678      |
|                            |                                           | RandomForest  | <b>0.741</b>           | 0.704 - 0.778 | 0.731              | 0.603              | 0.648      | 0.692      |
|                            | Demographic + Environmental factors       | GLM           | <b>0.732</b>           | 0.693 - 0.771 | 0.701              | 0.606              | 0.640      | 0.670      |
|                            |                                           | RandomForest  | <b>0.727</b>           | 0.690 - 0.764 | 0.695              | 0.623              | 0.648      | 0.671      |
|                            | Demographic + GPS                         | GLM           | <b>0.600</b>           | 0.559 - 0.641 | 0.573              | 0.529              | 0.549      | 0.553      |
|                            |                                           | RandomForest  | <b>0.575</b>           | 0.533 - 0.617 | 0.543              | 0.552              | 0.548      | 0.547      |
|                            | Demographic only                          | GLM           | <b>0.585</b>           | 0.551 - 0.619 | 0.492              | 0.567              | 0.532      | 0.527      |
|                            |                                           | RandomForest  | <b>0.591</b>           | 0.558 - 0.623 | 0.499              | 0.578              | 0.542      | 0.536      |
| <b>Suicide Attempt</b>     | Demographic + GPS + Environmental factors | GLM           | <b>0.768</b>           | 0.640 - 0.895 | 0.582              | 0.591              | 0.587      | 0.586      |
|                            |                                           | RandomForest  | <b>0.717</b>           | 0.565 - 0.868 | 0.803              | 0.698              | 0.727      | 0.780      |
|                            | Demographic + Environmental factors       | GLM           | <b>0.552</b>           | 0.396 - 0.707 | 0.658              | 0.641              | 0.647      | 0.652      |
|                            |                                           | RandomForest  | <b>0.714</b>           | 0.554 - 0.873 | 0.829              | 0.650              | 0.703      | 0.792      |

|  |                  |              |              |               |       |       |       |       |
|--|------------------|--------------|--------------|---------------|-------|-------|-------|-------|
|  | Demographic+GPS  | GLM          | <b>0.645</b> | 0.488 - 0.801 | 0.530 | 0.517 | 0.523 | 0.524 |
|  |                  | RandomForest | <b>0.629</b> | 0.481 - 0.777 | 0.525 | 0.547 | 0.537 | 0.535 |
|  | Demographic only | GLM          | <b>0.643</b> | 0.536 - 0.749 | 0.587 | 0.475 | 0.528 | 0.535 |
|  |                  | RandomForest | <b>0.646</b> | 0.546 - 0.746 | 0.598 | 0.430 | 0.512 | 0.517 |

**eTable 7.** Feature Importance of Elastic Net Model for Prediction of Suicidal Thoughts and Behaviors Among Youths

(A) European-ancestry individuals only

| Overall Suicidality                       |         |                             |         | Suicidal Ideation                         |         |                             |         | Suicide Attempt                           |         |                   |         |
|-------------------------------------------|---------|-----------------------------|---------|-------------------------------------------|---------|-----------------------------|---------|-------------------------------------------|---------|-------------------|---------|
| Demographic + GPS + Environmental factors |         | Demographic + GPS           |         | Demographic + GPS + Environmental factors |         | Demographic + GPS           |         | Demographic + GPS + Environmental factors |         | Demographic + GPS |         |
|                                           | Overall |                             | Overall |                                           | Overall |                             | Overall |                                           | Overall |                   | Overall |
| Depress.CBCL                              | 100     | married3                    | 100     | Depress.CBCL                              | 100     | sex1                        | 100     | TotProb.CBCL                              | 100     | income            | 100     |
| Internal.CBCL                             | 95.58   | sex1                        | 97.49   | AnxDep.CBCL                               | 98.76   | married3                    | 95.32   | fes_q1                                    | 56.357  | sex1              | 56.31   |
| TotProb.CBCL                              | 93.37   | RISK4PC                     | 76.06   | Internal.CBCL                             | 97.63   | income                      | 86.75   | External.CBCL                             | 48.8013 | ADHD              | 45.39   |
| External.CBCL                             | 85.81   | ADHD                        | 65.3    | TotProb.CBCL                              | 89.11   | GENERALHAPPINESS_MEANINGFUL | 80.93   | SCZ                                       | 35.9829 | SNORING           | 31.71   |
| AnxDep.CBCL                               | 81.67   | income                      | 64.94   | External.CBCL                             | 82.56   | SNORING                     | 72.47   | fes_q6                                    | 17.6458 | IQ                | 28.09   |
| Obsessive.Compulsive.Problems..OCD..CBCL  | 62.43   | married5                    | 50.65   | Obsessive.Compulsive.Problems..OCD..CBCL  | 72.67   | married5                    | 68.77   | PTSD                                      | 7.8757  | race.ethnicity2   | 24.74   |
| RuleBreak.CBCL                            | 61.78   | PTSD                        | 43.84   | fes_q4                                    | 65.69   | SMOKER                      | 56.92   | married6                                  | 5.7067  | married3          | 12.42   |
| Conduct.CBCL                              | 60.3    | AD                          | 39.82   | Conduct.CBCL                              | 58.78   | CP                          | 51.41   | Sluggish.Cognitive.Tempo..SCT..CBCL       | 3.686   | GENERALHAPPINESS  | 0       |
| Stress.CBCL                               | 59.24   | GENERALHAPPINESS_MEANINGFUL | 37.88   | Stress.CBCL                               | 58.62   | RISKTOL                     | 49.24   | ASD                                       | 0.6916  | race.ethnicity5   | 0       |
| Opposit.CBCL                              | 57.2    | NEUROTICISM                 | 37.69   | Opposit.CBCL                              | 56.35   | PTSD                        | 46.68   | DEPRESSION                                | 0       | PTSD              | 0       |

(B) Entire multiethnic individuals

| Overall Suicidality                       |         |                             |         | Suicidal Ideation                         |         |                             |         | Suicide Attempt                           |         |                         |         |
|-------------------------------------------|---------|-----------------------------|---------|-------------------------------------------|---------|-----------------------------|---------|-------------------------------------------|---------|-------------------------|---------|
| Demographic + GPS + Environmental factors |         | Demographic + GPS           |         | Demographic + GPS + Environmental factors |         | Demographic + GPS           |         | Demographic + GPS + Environmental factors |         | Demographic + GPS       |         |
|                                           | Overall |                             | Overall |                                           | Overall |                             | Overall |                                           | Overall |                         | Overall |
| Depress.CBCL                              | 100     | married3                    | 100     | Depress.CBCL                              | 100     | sex1                        | 100     | Internal.CBCL                             | 100     | income                  | 100     |
| AnxDep.CBCL                               | 74.58   | income                      | 68.06   | TotProb.CBCL                              | 95.13   | married3                    | 99.24   | AnxDep.CBCL                               | 89.66   | sex1                    | 4.672   |
| Internal.CBCL                             | 71.78   | married5                    | 65.08   | Internal.CBCL                             | 91.86   | race.ethnicity5             | 80.95   | IQ                                        | 89.37   | race.ethnicity3         | 0       |
| sex1                                      | 66.44   | sex1                        | 56.29   | AnxDep.CBCL                               | 89.48   | MDD                         | 70.68   | Obsessive.Compulsive.Problems.OCD.CBCL    | 87.56   | married6                | 0       |
| fes_q1                                    | 63.42   | married6                    | 53.23   | External.CBCL                             | 89.16   | SMOKER                      | 68.24   | fes_q1                                    | 80.35   | HAPPINESS               | 0       |
| TotProb.CBCL                              | 61.86   | MDD                         | 53      | fes_q1                                    | 87.88   | SNORING                     | 66.66   | TotProb.CBCL                              | 77.08   | NEUROTICISM             | 0       |
| External.CBCL                             | 61.18   | age                         | 51.8    | fes_q3                                    | 72.17   | GENERALHAPPINESS_MEANINGFUL | 63.68   | income                                    | 76.97   | GENERALHAPPINESS_HEALTH | 0       |
| Opposit.CBCL                              | 52.02   | GENERALHAPPINESS_MEANINGFUL | 49.48   | fes_q2                                    | 71      | age                         | 55.5    | Sluggish.Cognitive.Tempo.SCT.CBCL         | 72.77   | DRINK                   | 0       |
| ADHD                                      | 50.2    | INSOMNIA                    | 47.4    | Social.CBCL                               | 64.64   | income                      | 51.32   | fes_q2                                    | 72.05   | age                     | 0       |
| Aggressive.CBCL                           | 47.3    | SMOKER                      | 43.13   | Obsessive.Compulsive.Problems.OCD.CBCL    | 62.57   | ASD                         | 46.59   | External.CBCL                             | 68.78   | CP                      | 0       |

**eTable 8.** Early Life Stress Scale in Detail

| Main-scale | Sub-scale                                                        | Title of scales                                                                        | Contents of questions                                                                  | Scoring                                           | Meaning behind scoring | Make sub-scales     | Make main-scales                         | Make ELS total               |
|------------|------------------------------------------------------------------|----------------------------------------------------------------------------------------|----------------------------------------------------------------------------------------|---------------------------------------------------|------------------------|---------------------|------------------------------------------|------------------------------|
| Abuse (Ab) | Family Environment Scale (parent and youth) KSADS-5, PTSD module | ABCD Youth Family Environment Scale-Family Conflict Subscale Modified from PhenX (FES) | ABCD Youth Family Environment Scale-Family Conflict Subscale Modified from PhenX (FES) | Family members sometimes hit each other.          | 0;1                    | 0 = False; 1 = True | 0; 1 (_PA_1, z-standardized)             |                              |
|            |                                                                  |                                                                                        |                                                                                        | A family member threatened to kill your child     | 0;1                    |                     | $Ab\_PA = \{(\_PA\_1) + (\_PA\_2)\} / 2$ | $Ab = (Ab\_PA + Ab\_SA) / 2$ |
|            |                                                                  | ABCD Parent Diagnostic Interview for DSM-5 (KSADS) Traumatic Events                    | ABCD Parent Diagnostic Interview for DSM-5 (KSADS) Traumatic Events                    | A non-family member threatened to kill your child | 0;1                    | 0 = No; 1 = Yes     | 0 - 12 (_PA_2, z-standardized)           |                              |
|            |                                                                  | Beaten to the point of having bruises by a grown up in the home                        | 0;1                                                                                    |                                                   |                        |                     |                                          |                              |

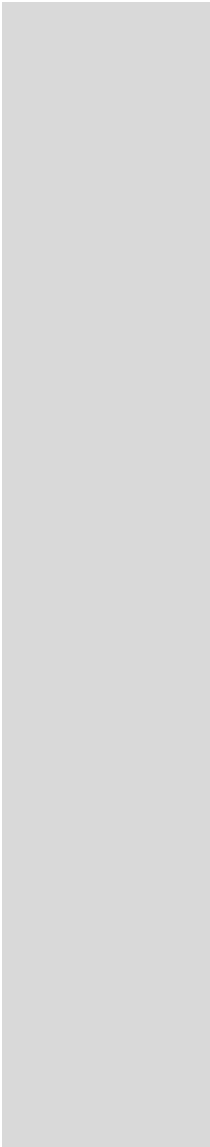

Shot, stabbed, or  
beaten brutally by  
a grown up in the  
home 0;1

Shot, stabbed, or  
beaten brutally by  
a non-family  
member 0;1

Witnessed  
someone shot or  
stabbed in the  
community 0;1

Witnessed death  
or mass  
destruction in a  
war zone 0;1

Witnessed or  
present during an  
act of terrorism  
(e.g., Boston  
marathon  
bombing) 0;1

|                      |                        |                                            |                                                                                                                  |     |                 |                               |       |
|----------------------|------------------------|--------------------------------------------|------------------------------------------------------------------------------------------------------------------|-----|-----------------|-------------------------------|-------|
| KSADS-5, PTSD module | ABCD Parent Diagnostic | ABCD Parent Diagnostic Interview for DSM-5 | Witnessed or caught in a natural disaster that caused significant property damage or personal injury             | 0;1 | 0 = No; 1 = Yes | 0 - 3 (Ab_SA, z-standardized) | Ab_SA |
|                      |                        |                                            | Witnessed or caught in a fire that caused significant property damage or personal injury                         | 0;1 |                 |                               |       |
|                      |                        |                                            | Another significant accident for which your child needed specialized and intensive medical treatment             | 0;1 |                 |                               |       |
|                      |                        |                                            | A car accident in which your child or another person in the car was hurt bad enough to require medical attention | 0;1 |                 |                               |       |
|                      |                        |                                            | A peer forced your child to do something sexually                                                                | 0;1 |                 |                               |       |



|                      |                      |                                                                     |                                                                     |                                                                                                                                                      |     |                 |                               |        |                                                       |
|----------------------|----------------------|---------------------------------------------------------------------|---------------------------------------------------------------------|------------------------------------------------------------------------------------------------------------------------------------------------------|-----|-----------------|-------------------------------|--------|-------------------------------------------------------|
| Household Challenges | KSADS-5, PTSD module | Interview for DSM-5 (KSADS) Traumatic Events                        | (KSADS) Traumatic Events                                            | An adult outside your family touched your child in his or her privates, had your child touch their privates or did other sexual things to your child | 0;1 |                 |                               |        |                                                       |
|                      |                      |                                                                     |                                                                     | A grown up in the home touched your child in his or her privates, had your child touch their privates, or did other sexual things to your child      | 0;1 |                 |                               |        |                                                       |
|                      |                      | ABCD Parent Diagnostic Interview for DSM-5 (KSADS) Traumatic Events | ABCD Parent Diagnostic Interview for DSM-5 (KSADS) Traumatic Events | Witness the grownups in the home push, shove or hit one another                                                                                      | 0;1 | 0 = No; 1 = Yes | 0; 1 (HC_MTV, z-standardized) | HC_MTV | HC = (HC_MTV + HC_HSA + HC_MIH + HC_PSD + HC_CHM) / 5 |

Family History Assessment Adult Self-report (parent)

ABCD Family History Assessment Part 1

ABCD Family History Assessment Part 1

Has ANY blood relative of your child ever had any problems due to alcohol, such as: Marital separation or divorce; Laid off or fired from work; Arrests or DUIs; Alcohol harmed their health; In an alcohol treatment program; Suspended or expelled from school 2 or more times; Isolated self from family, caused arguments or were drunk a lot.

0;1

0 = No; 1 = Yes

0 - 336 [1] ( $\text{HSA}_1$ , z-standardized)

$\text{HC\_HSA} = (\text{HSA}_1 + \text{HSA}_2 + \text{HSA}_3 + \text{HSA}_4 + \text{HSA}_5 + \text{HSA}_6 + \text{HSA}_7) / 7$

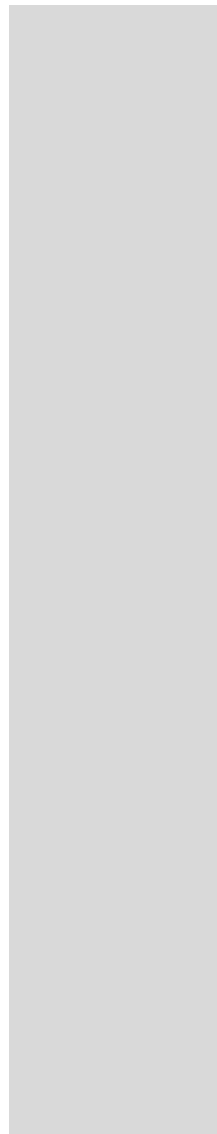

| ABCD Parent Adult Self Report Scores Aseba (ASR) | ABCD Parent Adult Self Report Scores Aseba (ASR) |                                                                                                                                                                                                                                                                                                                                           |          |                                                                                                          |
|--------------------------------------------------|--------------------------------------------------|-------------------------------------------------------------------------------------------------------------------------------------------------------------------------------------------------------------------------------------------------------------------------------------------------------------------------------------------|----------|----------------------------------------------------------------------------------------------------------|
|                                                  |                                                  | Has ANY blood relative of your child ever had any problems due to drugs, such as: Marital separation or divorce; Laid off or fired from work; Arrests or DUIs; Drugs harmed their health; In a drug treatment program; Suspended or expelled from school 2 or more times; Isolated self from family, caused arguments or were high a lot. | 0;1      | 0 = No; 1 = Yes<br>0 - 336 [2] ( <u>HSA_2</u> , z-standardized)                                          |
|                                                  |                                                  | I use drugs (other than alcohol, nicotine) for nonmedical purposes                                                                                                                                                                                                                                                                        | 0;1;2    | 0 = Not True; 1 = Somewhat/Sometimes True; 2 = Very True/Often<br>0 - 2 ( <u>HSA_3</u> , z-standardized) |
|                                                  |                                                  | I drink too much alcohol or get drunk                                                                                                                                                                                                                                                                                                     | 0;1;2    | 0 - 2 ( <u>HSA_4</u> , z-standardized)                                                                   |
|                                                  |                                                  | In the past 6 months, about how many times per day did you use tobacco (including smokeless tobacco)?                                                                                                                                                                                                                                     | 0 :: 100 | 0 - 2 ( <u>HSA_5</u> , z-standardized)                                                                   |

|                                                               |                                       |                                       |                                                                                                                                                                                                                             |                                                 |                                        |                                                                                                           |
|---------------------------------------------------------------|---------------------------------------|---------------------------------------|-----------------------------------------------------------------------------------------------------------------------------------------------------------------------------------------------------------------------------|-------------------------------------------------|----------------------------------------|-----------------------------------------------------------------------------------------------------------|
| Family History Assessment (parent) Adult Self-report (parent) | ABCD Family History Assessment Part 1 | ABCD Family History Assessment Part 1 | In the past 6 months, on how many days were you drunk?                                                                                                                                                                      | 0 - 180<br>(_HSA_6, z-standardized)             |                                        |                                                                                                           |
|                                                               |                                       |                                       | In the past 6 months, on how many days did you use drugs for nonmedical purposes (including marijuana, cocaine, and other drugs, except alcohol and nicotine)?                                                              | 0 :: 180<br>0 - 180<br>(_HSA_7, z-standardized) |                                        |                                                                                                           |
|                                                               |                                       |                                       | Has ANY blood relative of your child ever suffered from depression, that is, have they felt so low for a period of at least two weeks that they hardly ate or slept or couldn't work or do whatever they usually do?        | 0;1                                             | 0 - 48 [3]<br>(_MIH_1, z-standardized) |                                                                                                           |
|                                                               |                                       |                                       | Has ANY blood relative of your child ever had a period of time when others were concerned because they suddenly became more active day and night and seemed not to need any sleep and talked much more than usual for them? | 0 = No; 1 = Yes                                 | 0 - 48 [3]<br>(_MIH_2, z-standardized) | HC_MIH =<br>(_MIH_1+_MIH_2+_MIH_3+_MIH_4+_MIH_5+_MIH_6+_MIH_7+_MIH_8+_MIH_9+_MIH_10+_MIH_11+_MIH_12) / 12 |

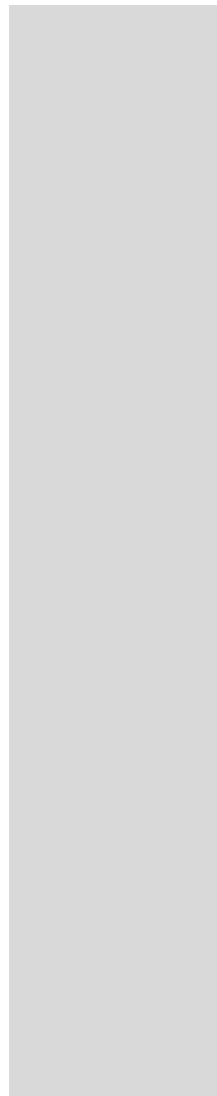

|                                                                              |                                                                  |                                                                                                                                                                                                               |           |                                            |
|------------------------------------------------------------------------------|------------------------------------------------------------------|---------------------------------------------------------------------------------------------------------------------------------------------------------------------------------------------------------------|-----------|--------------------------------------------|
| ABCD<br>Parent<br>Adult<br>Self<br>Report<br>Raw<br>Scores<br>Aseba<br>(ASR) | ABCD Parent<br>Adult Self<br>Report Raw<br>Scores Aseba<br>(ASR) | Has ANY blood<br>relative of your<br>child ever had a<br>period lasting six<br>months when they<br>saw visions or<br>heard voices or<br>thought people<br>were spying on<br>them or plotting<br>against them? | 0;1       | 0 - 48 [3]<br>(_MIH_3, z-<br>standardized) |
|                                                                              |                                                                  | Has ANY blood<br>relative of your<br>child ever<br>attempted or<br>committed<br>suicide?                                                                                                                      | 0;1       | 0 - 48 [3]<br>(_MIH_4, z-<br>standardized) |
|                                                                              |                                                                  | Depressive<br>Problems ASR<br>DSM-5-Oriented<br>Scale (t score)                                                                                                                                               | 50 :: 100 | 0 - 28 (_MIH_5,<br>z-standardized)         |
|                                                                              |                                                                  | Anxiety Problems<br>ASR DSM-5-<br>Oriented Scale (t<br>score)                                                                                                                                                 | 50 :: 80  | 0 - 12 (_MIH_6,<br>z-standardized)         |
|                                                                              |                                                                  | Somatic Problems<br>ASR DSM-5-<br>Oriented Scale (t<br>score)                                                                                                                                                 | 50 :: 100 | 0 - 18 (_MIH_7,<br>z-standardized)         |
|                                                                              |                                                                  | Avoidant<br>Personality<br>Problems ASR<br>DSM-5-Oriented<br>Scale t score)                                                                                                                                   | 50 :: 90  | 0 - 14 (_MIH_8,<br>z-standardized)         |

|                                    |                                       |                                       |                                                                                                                                                                                                                                   |           |                                          |                                     |        |
|------------------------------------|---------------------------------------|---------------------------------------|-----------------------------------------------------------------------------------------------------------------------------------------------------------------------------------------------------------------------------------|-----------|------------------------------------------|-------------------------------------|--------|
|                                    |                                       |                                       | AD/H Problems ASR DSM-5-Oriented Scale (t score)                                                                                                                                                                                  | 50 :: 100 |                                          | 0 - 26 (_MIH_9, z-standardized)     |        |
|                                    |                                       |                                       | Antisocial Personality Problems ASR DSM-5-Oriented Scale (t score)                                                                                                                                                                | 50 :: 100 |                                          | 0 - 40 (_MIH_10, z-standardized)    |        |
|                                    |                                       |                                       | Inattention ASR DSM-5-Oriented Scale (t score)                                                                                                                                                                                    | 50 :: 90  |                                          | 0 - 14 (_MIH_11, z-standardized)    |        |
|                                    |                                       |                                       | Hyperactivity-Impulsivity ASR DSM-5-Oriented Scale (t score)                                                                                                                                                                      | 50 :: 80  |                                          | 0 - 12 (_MIH_12, z-standardized)    |        |
| Demographics Survey (parent)       | ABCD Parent Demographics Survey       | ABCD Parent Demographics Survey       | Are you now married, widowed, divorced, separated, never married or living with a partner?                                                                                                                                        | 1 :: 6    | 1 = divorced, separated ; 0 = the others | 0; 1 (HC_PSD, z-standardized)       | HC_PSD |
| Family history Assessment (parent) | ABCD Family History Assessment Part 2 | ABCD Family History Assessment Part 2 | Has ANY blood relative of your child been the kind of person who never holds a job for long, or gets into fights, or gets into trouble with the police from time to time, or had any trouble with the law as a child or an adult? | 0;1       | 0 = No; 1 = Yes                          | 0 - 48 [3] (HC_CHM, z-standardized) | HC_CHM |

|         |                                            |                                                                           |                                                                        |                                                                                                                                                                 |      |                                                                                                    |                                                                 |       |                          |
|---------|--------------------------------------------|---------------------------------------------------------------------------|------------------------------------------------------------------------|-----------------------------------------------------------------------------------------------------------------------------------------------------------------|------|----------------------------------------------------------------------------------------------------|-----------------------------------------------------------------|-------|--------------------------|
| Neglect | CRPBI<br>Acceptance<br>Subscale<br>(youth) | ABCD<br>Children's<br>Report<br>of<br>Parental<br>Behavioral<br>Inventory | ABCD<br>Children's<br>Report of<br>Parental<br>Behavioral<br>Inventory | First caregiver<br>(caregiver<br>participating in<br>study/completing<br>protocol). Makes<br>me feel better<br>after talking over<br>my worries with<br>him/her | 1::3 |                                                                                                    |                                                                 |       |                          |
|         |                                            |                                                                           |                                                                        | First caregiver<br>(caregiver<br>participating in<br>study/completing<br>protocol). Smiles<br>at me very often.                                                 | 1::3 |                                                                                                    |                                                                 |       |                          |
|         |                                            |                                                                           |                                                                        | First caregiver<br>(caregiver<br>participating in<br>study/completing<br>protocol). Is able<br>to make me feel<br>better when I am<br>upset.                    | 1::3 | 1 = Not<br>like<br>him/her; 2<br>=<br>Somewhat<br>like<br>him/her; 3<br>= A lot<br>like<br>him/her | (score reverse<br>coding) 10 -<br>30(Ne_EN, z-<br>standardized) | Ne_EN | Ne = (Ne_EN + Ne_PN) / 2 |
|         |                                            |                                                                           |                                                                        | First caregiver<br>(caregiver<br>participating in<br>study/completing<br>protocol). Believes<br>in showing his/her<br>love for me.                              | 1::3 |                                                                                                    |                                                                 |       |                          |
|         |                                            |                                                                           |                                                                        | First caregiver<br>(caregiver<br>participating in<br>study/completing<br>protocol). Is easy<br>to talk to.                                                      | 1::3 |                                                                                                    |                                                                 |       |                          |

|                             |                                 |                                 |                                                                                                |      |                                                                                   |                                                       |       |
|-----------------------------|---------------------------------|---------------------------------|------------------------------------------------------------------------------------------------|------|-----------------------------------------------------------------------------------|-------------------------------------------------------|-------|
| Parental Monitoring (youth) | ABCD Parental Monitoring Survey | ABCD Parental Monitoring Survey | Second caregiver. Makes me feel better after talking over my worries with him/her.             | 1::3 |                                                                                   |                                                       |       |
|                             |                                 |                                 | Second caregiver. Smiles at me very often.                                                     | 1::3 |                                                                                   |                                                       |       |
|                             |                                 |                                 | Second caregiver. Is able to make me feel better when I am upset.                              | 1::3 |                                                                                   |                                                       |       |
|                             |                                 |                                 | Second caregiver. Believes in showing his/her love for me.                                     | 1::3 |                                                                                   |                                                       |       |
|                             |                                 |                                 | Second caregiver. Is easy to talk to.                                                          | 1::3 |                                                                                   |                                                       |       |
|                             |                                 |                                 | How often do your parents/guardians know where you are?                                        | 1::5 | 1 = Never; 2 = Almost Never; 3 = Sometime; 4 = Often; 5 = Always or Almost Always | (score reverse coding) 5 - 25 (Ne_PN, z-standardized) | Ne_PN |
|                             |                                 |                                 | How often do your parents know who you are with when you are not at school and away from home? | 1::5 |                                                                                   |                                                       |       |



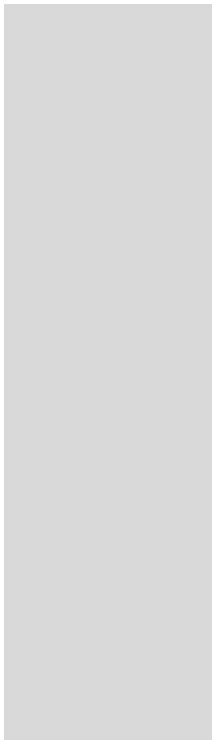

If you are at home when your parents or guardians are not, how often do you know how to get in touch with them? 1::5

How often do you talk to your mom/dad or guardian about your plans for the coming day, such as your plans about what will happen at school or what you are going to do with friends? 1::5

In an average week, how many times do you and your parents/guardians eat dinner together? 1::5

[1] 336 = max. 48 family members multiplied by max. 7 problems. Max. 48 people; parentnal grandfather, paternal grandmother, biological mother, maternal grandfather, maternal grandmother, biological father, paternal uncle (max. 5 people), maternal uncle (max. 5 people), paternal aunt(max. 5 people), maternal aunt (max. 5 people), full sibling-younger (max. 5 people), full sibling-older (max. 5 people), half sibling-younger (max. 5 people), half sibling-older (max. 5 people), full sibling-same age (max. 2 people). Max. 7 problems; 1) Marital separation or divorce 2) Laid off or fired from work 3) Arrests or DUIs 4) Alcohol harmed their health 5) In an alcohol treatment program 6) Suspended or expelled from school 2 or more times 7) Isolated self from family, caused arguments or were drunk a lot.

[2] 336 = max. 48 family members multiplied by max. 7 problems. Max. 48 people; parentnal grandfather, paternal grandmother, biological mother, maternal grandfather, maternal grandmother, biological father, paternal uncle (max. 5 people), maternal uncle (max. 5 people), paternal aunt(max. 5 people), maternal aunt (max. 5 people), full sibling-younger (max. 5 people), full sibling-older (max. 5 people), half sibling-younger (max. 5 people), half sibling-older (max. 5 people), full sibling-same age (max. 2 people). Max. 7 problems; 1) Marital separation or divorce 2) Laid off or fired from work 3) Arrests or DUIs 4) Drugs harmed their health 5) In a drug treatment program 6) Suspended or expelled from school 2 or more times 7) Isolated self from family, caused arguments or were high a lot

[3] 48 = max. 48 family members. Max. 48 people; parentnal grandfather, paternal grandmother, biological mother, maternal grandfather, maternal grandmother, biological father, paternal uncle (max. 5 people), maternal uncle (max. 5 people), paternal aunt(max. 5 people), maternal aunt (max. 5 people), full sibling-younger (max. 5 people), full sibling-older (max. 5 people), half sibling-younger (max. 5 people), half sibling-older (max. 5 people), full sibling-same age (max. 2 people).

**eFigure 1.** Biplot From Principal Component Analysis of the Combined Genotype Data of 1000-Genome Reference Panel (Phase 3, Release 5) and ABCD Study Participants

Colored by self-reported ethnicity. We removed the outliers fell outside of the 6SD limits (blue line) from the center in PC spaces.

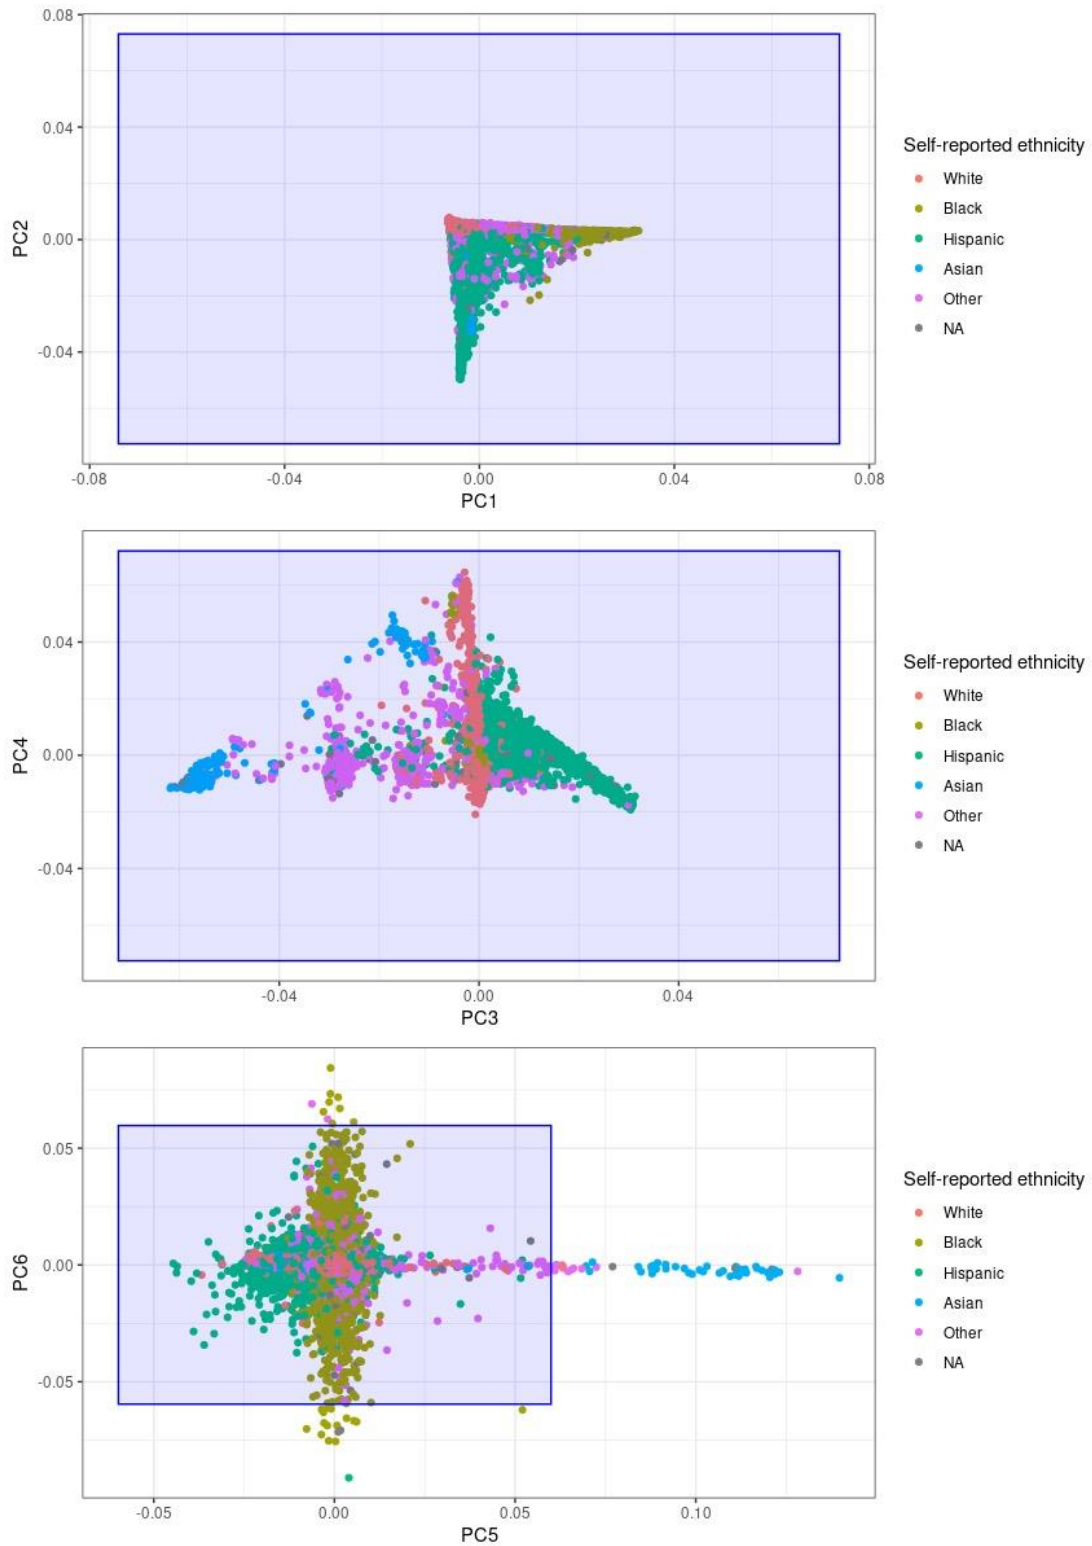

**eFigure 2.** Analysis of the Association Between Multitrait Genome-Wide Polygenic Scores and Suicidal Thoughts and Behaviors Among 6592 Multiethnic Children

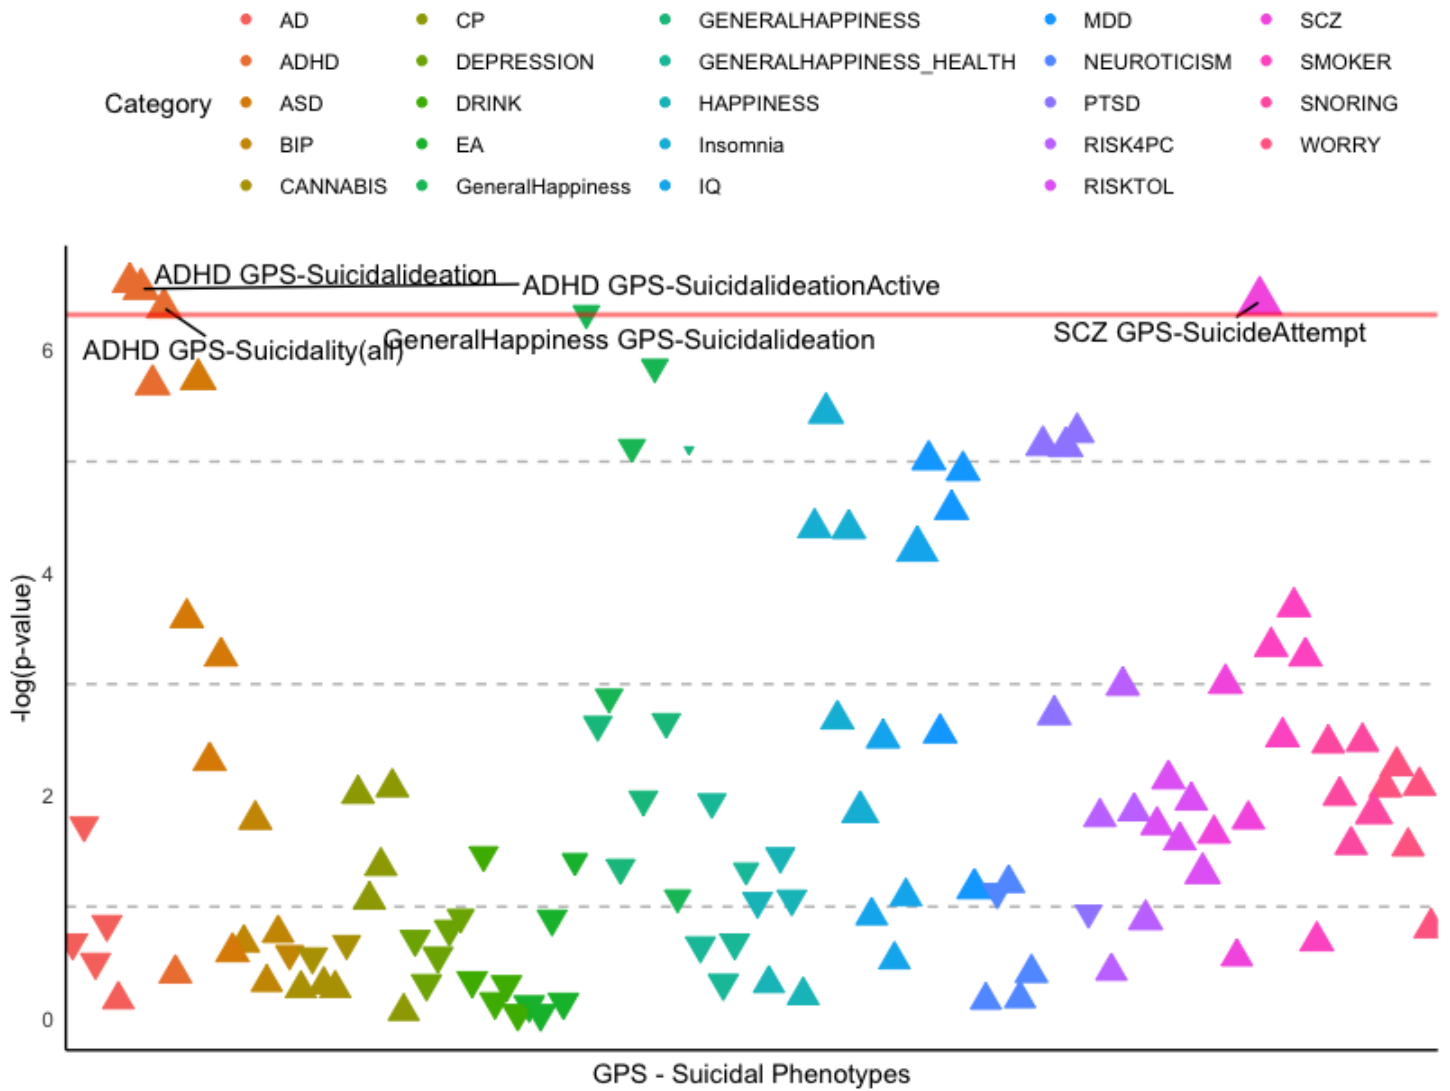

## eReferences

1. Conomos, M. P., Miller, M. B. & Thornton, T. A. Robust inference of population structure for ancestry prediction and correction of stratification in the presence of relatedness. *Genet. Epidemiol.* **39**, 276–293 (2015).
2. Conomos, M. P., Reiner, A. P., Weir, B. S. & Thornton, T. A. Model-free Estimation of Recent Genetic Relatedness. *Am. J. Hum. Genet.* **98**, 127–148 (2016).
